# Supplementary material
Source: publisher figshare collection journal article supplement (https://acs.figshare.com/ndownloader/files/4519879)
Supplement: Supplementary file 1 [file 4519879]

## Supplementary material for :

# Grafting poly(isobutylene) from nanoparticle surfaces: concentration and surface effects on livingness

Wolfgang H. Binder<sup>\*1)</sup>, Ronald Zirbs<sup>1)</sup>, Doris Machl<sup>2)</sup>, Markus Gahleitner<sup>2)</sup>

1) Martin-Luther Universität Halle-Wittenberg, Lehrstuhl für Makromolekulare Chemie

2) Borealis GmbH

Determination of the amount of initiating-sites on the surface of **NP1**:

A) 1 g NP(AE200<sub>dry</sub>) was modified with CECE and used for subsequent polymerization immediately. ([I]~5 mM; [TiCl<sub>4</sub>]=80 mM; [DMA]=5 mM; [DTBP]=3 mM; DCM:n-hexane=1:2, T=(-80 to -65 °C)) All yields are between 95 and 100%.

| IB      |      | [IB]/[I] | M <sub>n(th)</sub> | M <sub>n(GPC)</sub> | M <sub>n(th)/M<sub>n(GPC)</sub></sub><br>% |
|---------|------|----------|--------------------|---------------------|--------------------------------------------|
| g       | mol  |          |                    |                     |                                            |
| 7.37    | 0.13 | 178      | 10 000             | 17 500.00           | 57.14                                      |
| 14.74   | 0.26 | 356      | 20 000             | 31 500.00           | 63.49                                      |
| 22.11   | 0.39 | 535      | 30 000             | 46 000.00           | 65.22                                      |
| average |      |          |                    |                     | 61.95                                      |

The M<sub>n(th)</sub> was calculated using the literature known value of 0.737 mmol Si-OH-groups /g of silica-NP (r=6 nm). Comparing the obtained M<sub>n</sub> with the calculated one, the average number of polymers bound to the surface could be calculated. (N<sub>(ini)</sub>=0.737\*0.6195=0.457 mmol/g NP; total surface of the NP's used: 200 m<sup>2</sup>/g; using this one can calculate 0.85 initiator-molecules/nm<sup>2</sup>)

### B) TGA-data:

|                       | % silica (th) | % silica (TGA) | Error   |
|-----------------------|---------------|----------------|---------|
| NP1 with 17 500 g/mol | 11.9          | 12.8           | + 7.6 % |
| NP1 with 31 500 g/mol | 6.4           | 6.8            | + 6.3 % |
| NP1 with 46 000 g/mol | 4.3           | 4.1            | - 4.7 % |

These data clearly indicates that about 60-65% of the surface-binding sites (theoretical ~1.2 sites/nm<sup>2</sup>) are modified with the initiator (CECE) resulting in an average binding-density of 0.85 molecules/nm<sup>2</sup>.

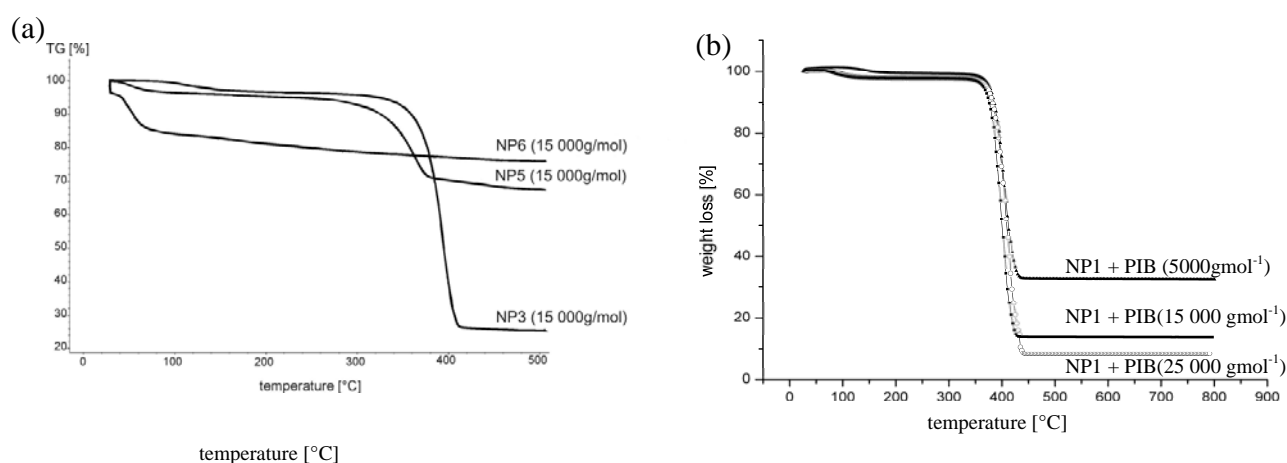

TGA's curves of NP's with different surface densities of initiator. (a) **NP6** (table 2) ( $15\,000\text{ g mol}^{-1}$ ): found: 5% (calc.:6%); **NP5** ( $15\,000\text{ g mol}^{-1}$ ): found: 20% (calc.:25%) and **NP3** ( $15\,000\text{ g mol}^{-1}$ ): found: 70% (calc.:76%) (b) **NP1** with  $5\,000\text{ g mol}^{-1}$  PIB; **NP1** with  $15\,000\text{ g mol}^{-1}$  PIB, **NP1** with  $25\,000\text{ g mol}^{-1}$  PIB.

(C)  $^{29}\text{Si}$ -solid state NMR (400 MHz, 4 mm rotors, rotation : 2000 Hz, CPMAS-mode, enabling to selectively monitor only the surface-bound  $^{29}\text{Si}$ -nuclei).

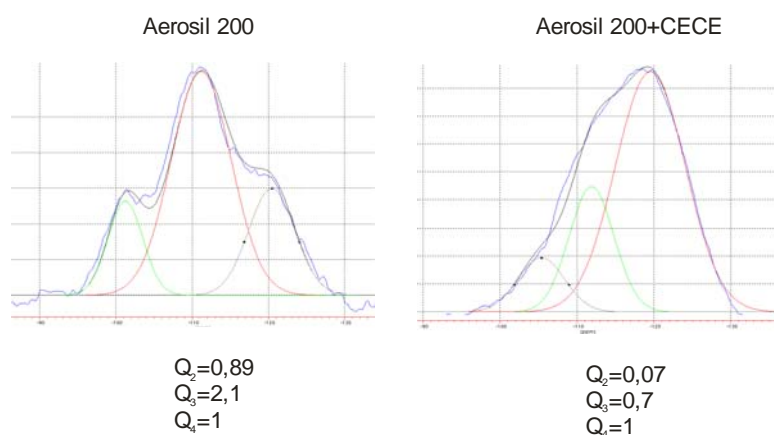

The number of bound initiators and accordingly the completeness of the surface-reaction could be analyzed using  $^{29}\text{Si}$ -CPMAS-NMR spectroscopy.  $^{29}\text{Si}$  CPMAS NMR spectroscopy was measured on a Bruker Avance DRX 400 spectrometer with a 4mm probehead at a frequency of 79.4905 MHz. The samples were filled into 4 mm zirconia rotors which were spun at 4000 Hertz. The spectra were acquired in the cross 3 polarization mode using contact times of 10 ms and high power dipolar decoupling to reduce line broadening. The pulse repetition time was 5 s and between 10 000 and 30 000 scans were used to achieve sufficient signal to noise ratio.

The decreasing value of  $Q^2$  ( $0.89 \rightarrow 0.07$ ) and  $Q^3$  ( $2.1 \rightarrow 0.7$ ) groups indicates that at least two-thirds of the surface groups of the NP's were modified during the modification. (60-65% of all groups modified)

# <sup>1</sup>H- NMR-spectra of NP3 and PIB-grafted NP1 (400 MHz)

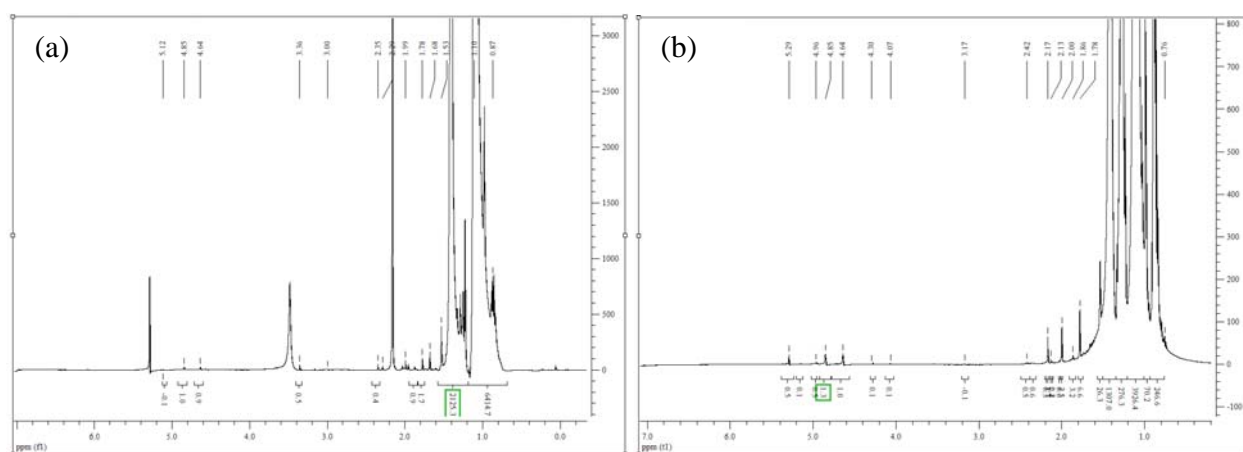

(a) <sup>1</sup>H-NMR-spectrum of NP3 with 55 555 g/mol PIB and (b) of PIB-grafted NP1 with 50 000g/mol PIB (0,8 chains/nm<sup>2</sup>)

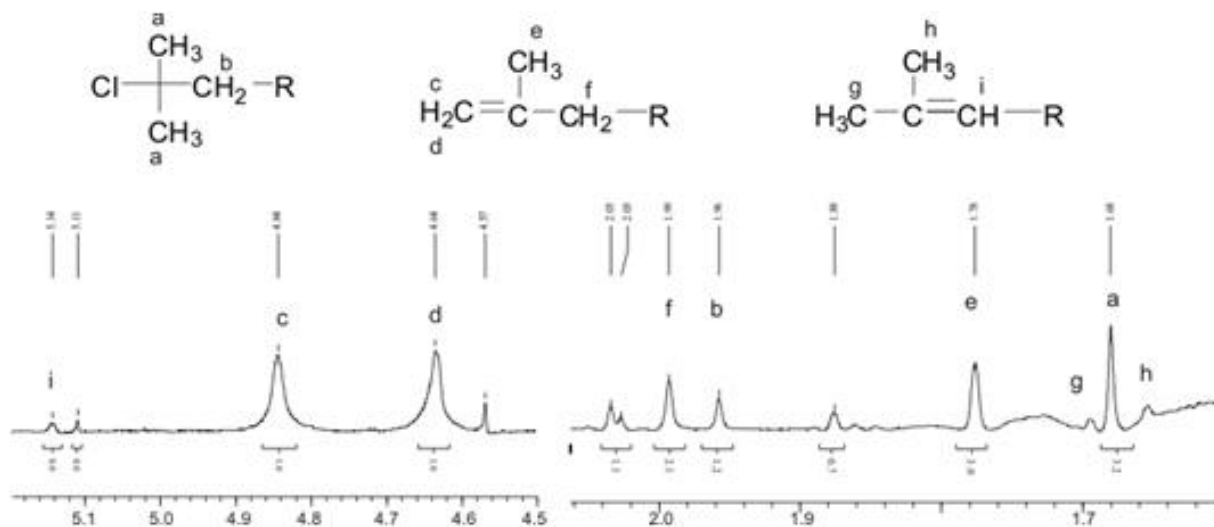

<sup>1</sup>H-NMR-spectra of endgroup-analysis of NP1, NP2 and NP3 (a) ppm-region from 4.5 – 5.2 ppm (b) ppm-region from 1.6 – 2.1 ppm.

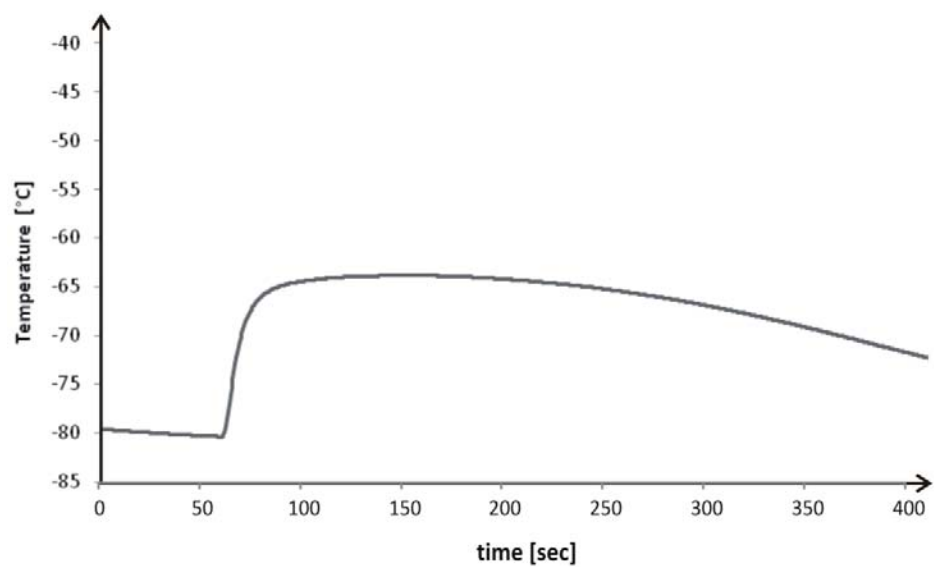

Temperature-profile during a standard grafting-from polymerization (**NP1**), monitored via inline- IR-spectroscopy.
